# Supplementary material
Source: publisher site journal article supplement (https://www.dovepress.com/get_supplementary_file.php?f=470657.docx)

**Supplementary tables**

| **Clinical Trial Number** | **Year of Publication** | **Study Design** | **Study Population** | **Number of Baseline Participants** | | **Age (Mean (Range))** | | **Sex (Measure (Percent))** | |
| --- | --- | --- | --- | --- | --- | --- | --- | --- | --- |
| **DEXTENZA** | **Placebo Vehicle** | **DEXTENZA** | **Placebo Vehicle** | **DEXTENZA** | **Placebo Vehicle** |
| **NCT02062905** | 2019 | Randomized Controlled Trial | Chronic Allergic Conjunctivitis | 35 | 33 | 45.5 (20–69) | 43.1 (21–71) | Female: 18 (51.4%)  Male: 17 (48.6%) | Female: 17 (51.5%)  Male: 16 (48.5%) |
| **NCT02988882** | 2020 | Randomized Controlled Trial | Chronic Allergic Conjunctivitis | 44 | 42 | 39.1 (20–68) | 42.2 (18–70) | Female: 26 (59.1%)  Male: 18 (40.9%) | Female: 25 (59.5%)  Male: 17 (40.5%) |
| **NCT02445326** | 2018 | Randomized Controlled Trial | Chronic Allergic Conjunctivitis | 35 | 38 | 38.2 (19–66) | 36.3 (18–62) | Female: 17 (48.6%)  Male: 18 (51.4%) | Female: 14 (36.8%)  Male: 24 (63.2%) |
| **NCT04050865** | 2021 | Randomized Controlled Trial | Chronic Allergic Conjunctivitis | 48 | 48 | 43.8 | 46 | Female: 27 (56.3%)  Male: 21 (43.8%) | Female: 24 (50%)  Male: 24 (50%) |

**Supplementary Table 1.** Trial characteristics.

**Supplementary figures:**

**Supplementary Figure 1.** Risk of bias summary.


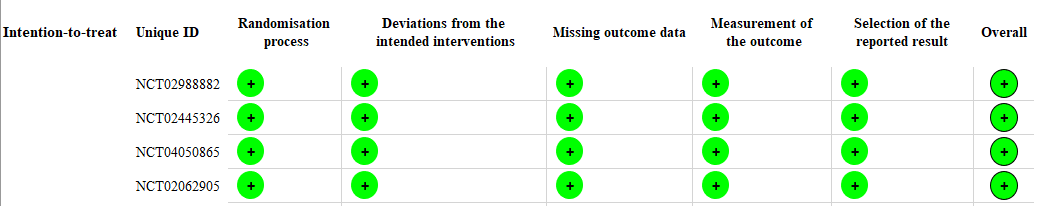


**Supplementary Figure 2.** Forest plot of sensitivity analysis of ocular itching in the conjunctival allergen challenge (CAC) model. CI, confidence interval; SD, standard deviation.
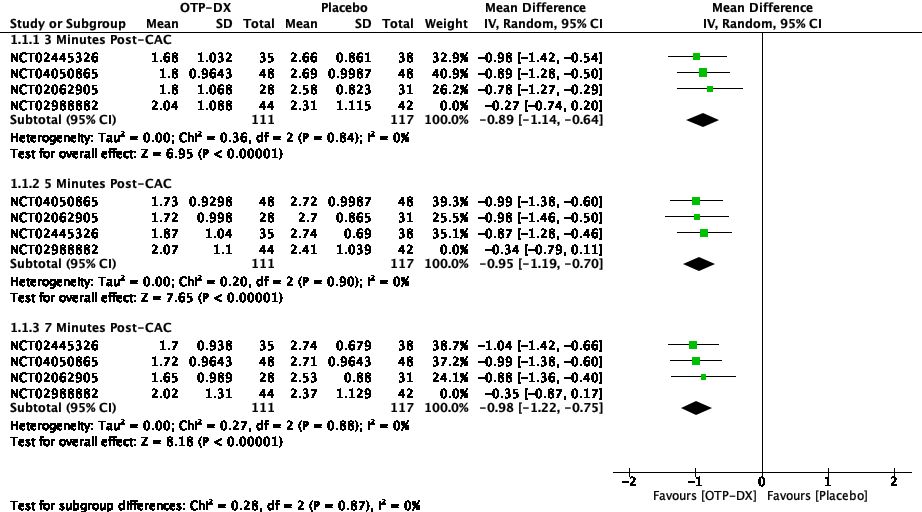


**Supplementary Figure 3.** Forest plot of adverse events. CI, confidence interval; SD, standard deviation.


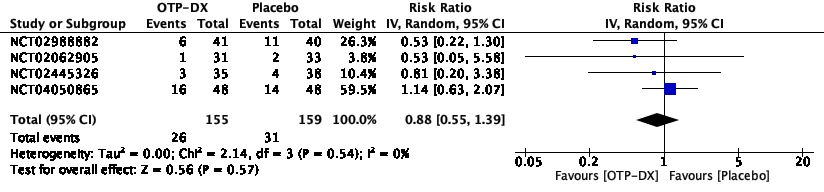

Supplement: Supplementary file 1 [file get_supplementary_file.php]
